# Supplementary material
Source: PubMed Central journal article supplement (PMC3475536)
Supplement: NIHMS409238-supplement-1_si_001.pdf [file NIHMS409238-supplement-1_si_001.pdf]

*Supporting Information for*

Mechanistic Studies on CymD: A Tryptophan Reverse

*N*-Prenyltransferase

Qi Qian‡, Andrew W. Schultz§, Bradley S. Moore§ and Martin E. Tanner‡\*

‡Department of Chemistry, University of British Columbia, Vancouver, British Columbia, Canada V6T 1Z1.

§Scripps Institution of Oceanography and Skaggs School of Pharmacy and Pharmaceutical Sciences, University of California San Diego, La Jolla, California 92093

\*E-mail: mtanner@chem.ubc.ca

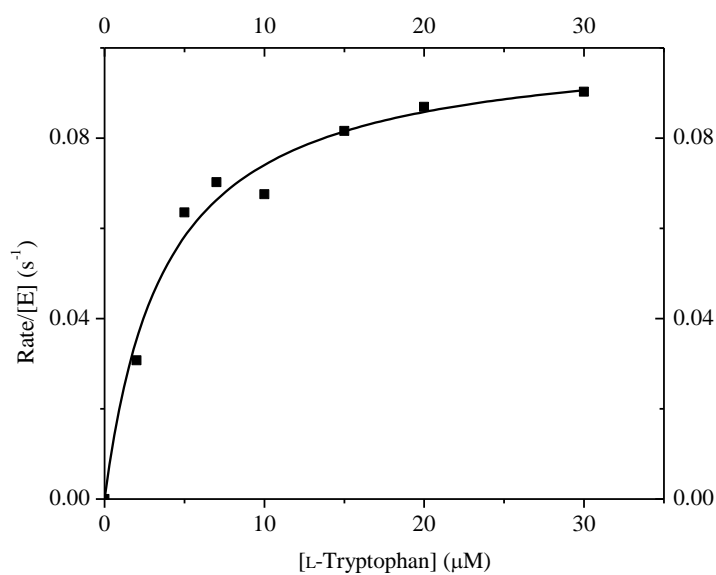

**Figure S1.** Enzyme kinetics plot of rate/[E] versus [S] for the prenyltransferase CymD with L-tryptophan (variable) and 20 μM DMAPP.

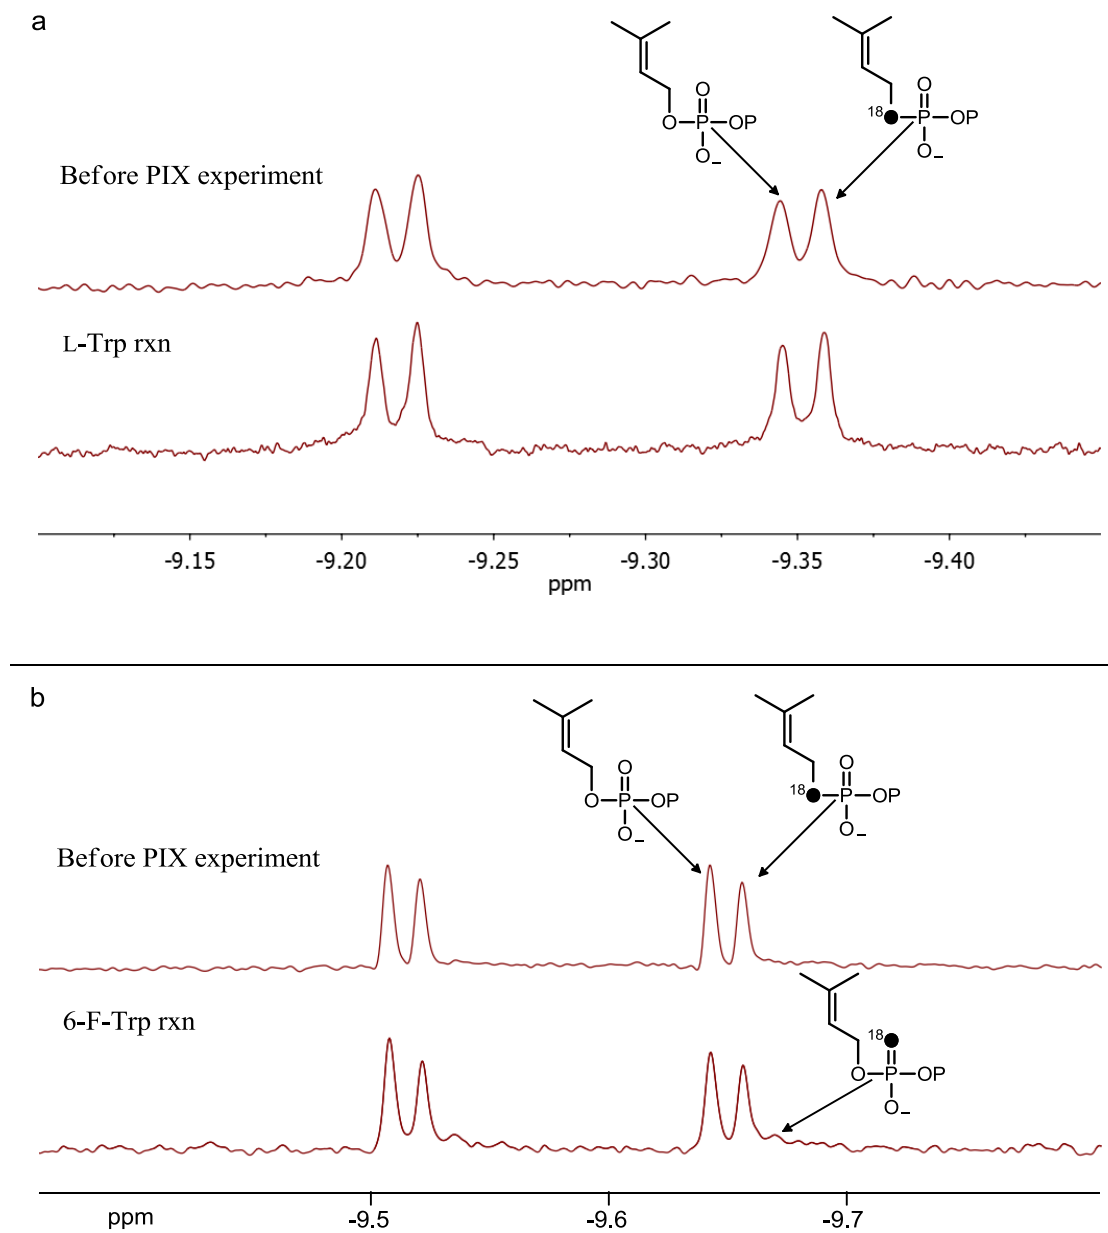

**Figure S2.**  $^{31}\text{P}$  NMR spectra showing the  $\alpha$ -phosphorus signals of the DMAPP mixture in the PIX reactions catalyzed by CymD. (a. PIX experiment with L-Trp. b. PIX experiment with 6-F-Trp.)

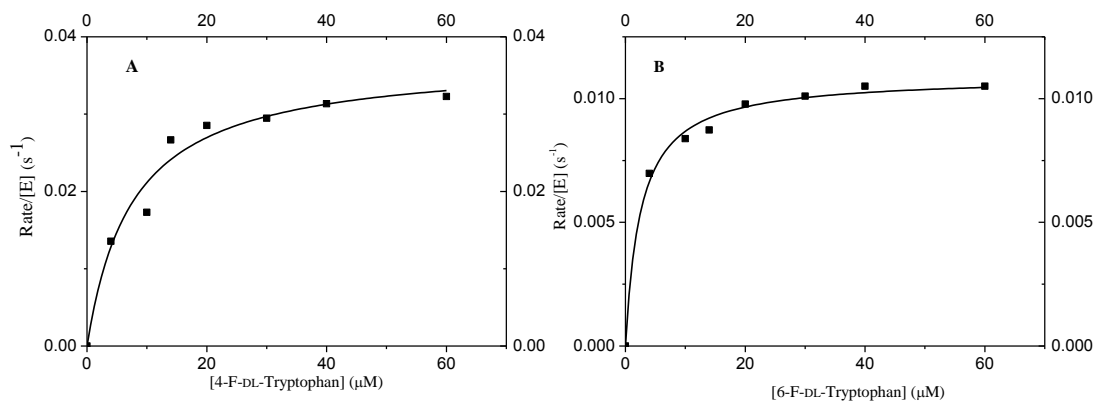

**Figure S3.** Enzyme kinetics plots of rate/[E] versus [S] for the prenyltransferase CymD with fluorinated tryptophans (variable) and 20 μM DMAPP. (A. 4-F-DL-tryptophan; B. 6-F-DL-tryptophan)

**Table S1.** Kinetic rates measured for DMAPP and *E*-F-DMAPP.

| Rate/[E]                                             | Conc. <sup>a</sup> | 10 μM               | 20 μM               |
|------------------------------------------------------|--------------------|---------------------|---------------------|
| $V_{\text{DMAPP}}/[\text{E}]$ (s <sup>-1</sup> )     |                    | 0.031               | 0.031               |
| $V_{\text{E-F-DMAPP}}/[\text{E}]$ (s <sup>-1</sup> ) |                    | $2.5 \cdot 10^{-4}$ | $3.2 \cdot 10^{-4}$ |
| $k_{\text{rel}}$                                     |                    | 0.008               | 0.010               |

a. In both cases [L-tryptophan] = 100 μM
